# Supplementary material for: Time-Dependent Indirect Antioxidative Effects of Oat Beta-Glucans on Peripheral Blood Parameters in the Animal Model of Colon Inflammation
Source: PubMed Central journal article supplement (PMC7278816; doi:10.3390/antiox9050375), 2020-04-30
Supplement: antioxidants-09-00375-s001.pdf [file antioxidants-09-00375-s001.pdf]

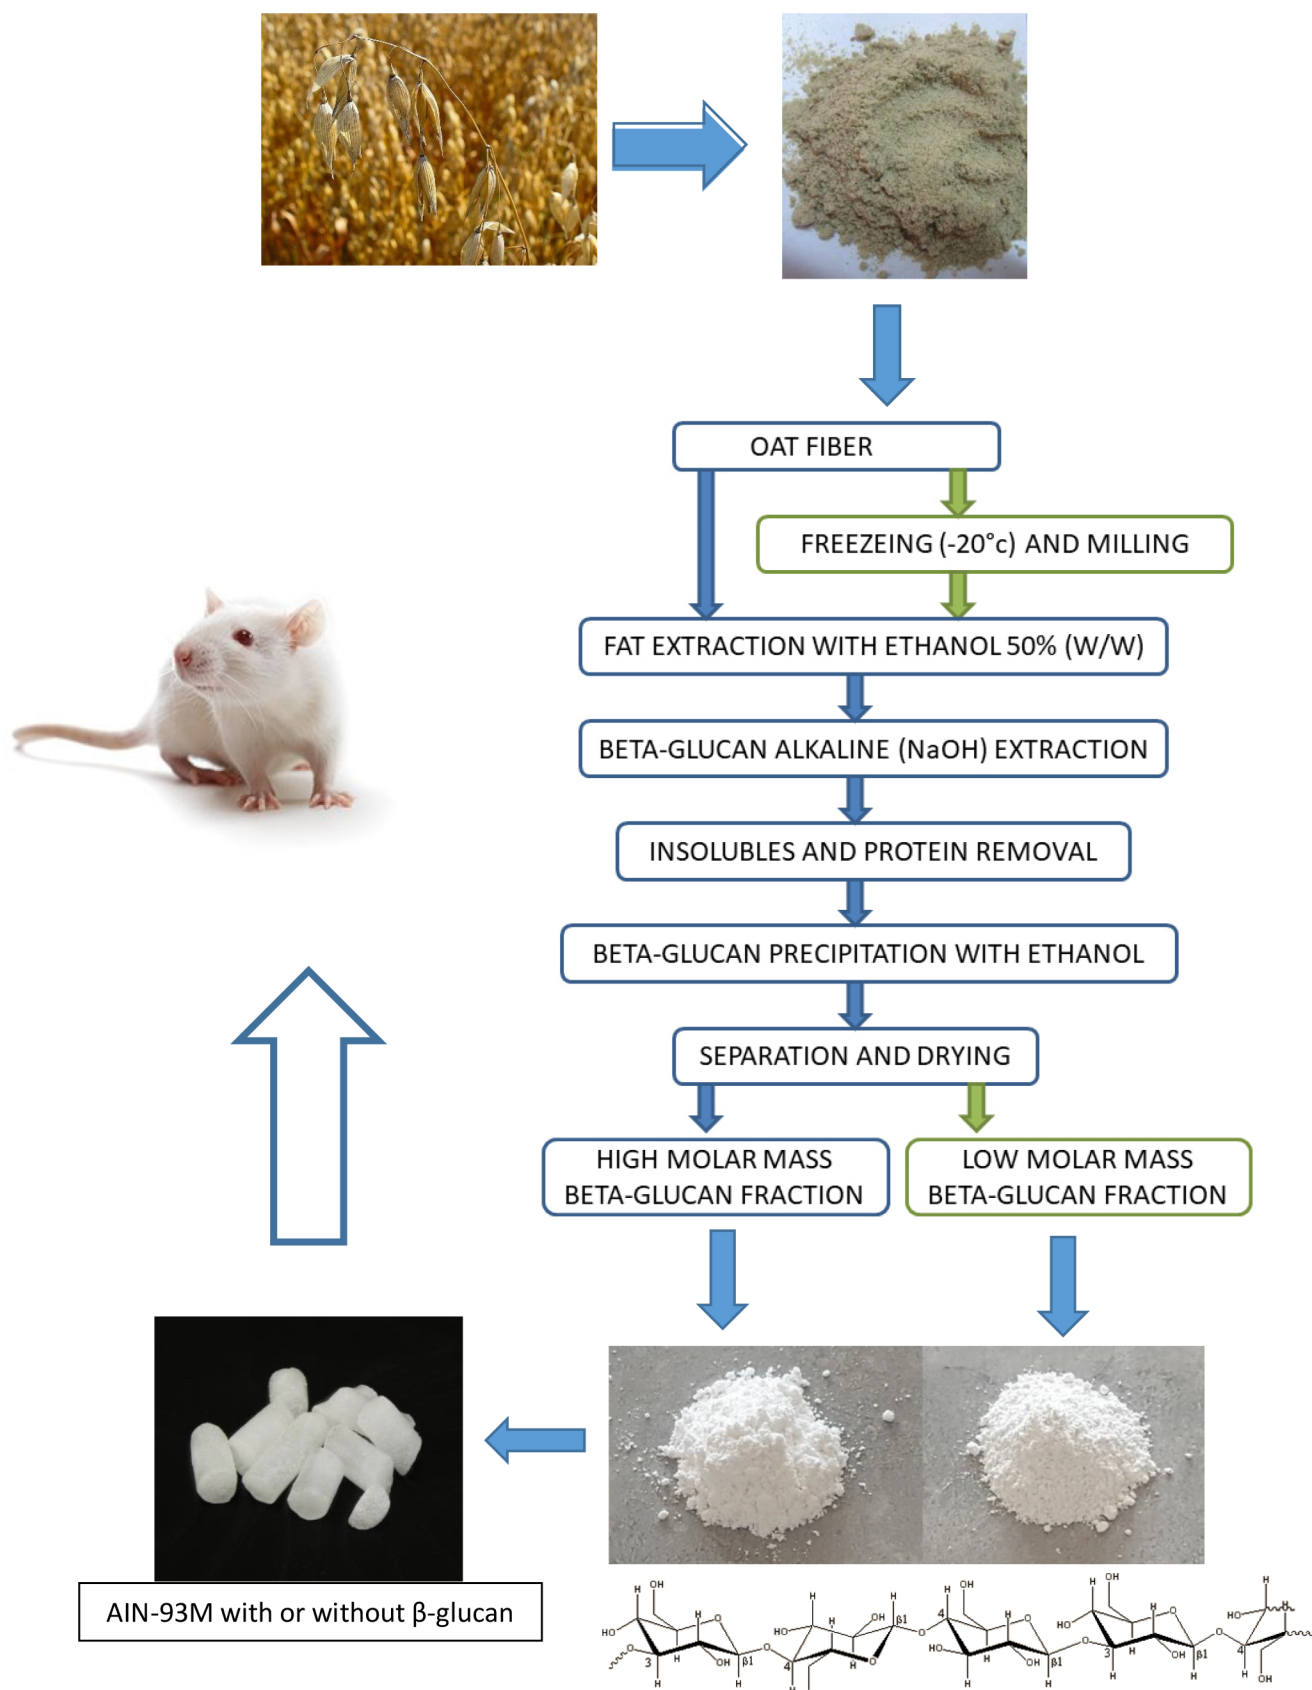

**Figure S1:** The streamlined scheme of beta-glucan different fractions isolation process and their chemical structure.
